# Supplementary material for: Random mutagenesis-based screening of the interface of phyllogen, a bacterial phyllody-inducing effector, for interaction with plant MADS-box proteins
Source: Front Plant Sci. 2023 Mar 28;14:1058059. doi: 10.3389/fpls.2023.1058059 (PMC10086140; doi:10.3389/fpls.2023.1058059)
Supplement: Supplementary file 3 [file Table_1.xlsx]

## Sheet: S1
Supplementary Table 1. Phyllogens used in the study.
Phyllogen groupa	Phyllogen name	Strain name	Strain abbreviation	Species	Accession No.	Reference
Phyl-A	PHYLOY	onion yellows	OY	Ca. P. asteris	AB812838	Maejima et al., 2014
	SAP54b	aster yellows phytoplasma strain witches' broom	AY-WB	Ca. P. asteris	CP000061	MacLean et al., 2011
	PHYLJHP	Japanese hydrangea phyllody	JHP	Ca. P. japonicum	LC388970	Iwabuchi et al., 2020
	PHYLRYD	rice yellow dwarf	RYD	Ca. P. oryzae	LC388973	Iwabuchi et al., 2020
Phyl-B	PHYLSY	strawberry yellows	SY	Ca. P. fragariae	LC388969	Iwabuchi et al., 2020
Phyl-C	PHYL231/09	231/09	231/09	Ca. P. solani	FO393428	Mitrović et al., 2014c
Phyl-D	PHYLPnWB	peanut witches' broom	PnWB	Ca. P. aurantifolia	AMWZ01000001	Chung et al., 2013d
	PHYLWBDL	witches' broom of lime	WBDL	Ca. P. aurantifolia	LC388975	Iwabuchi et al., 2020
a: Grouping is based on phylogenetic analysis using nucleotide sequences (Iwabuchi et al., 2020).
b: Secreted AY-WB protein 54
c: Mitrović, J., Siewert, C., Duduk, B., Hecht, J., Mölling, K., Broecker, F. et al. (2014). Generation and analysis of draft sequences of “stolbur” phytoplasma from multiple displacement amplification templates. Mol. Microbiol. Biotech. 24, 1–11. doi: 10.1159/000353904
d: Chung, W. C., Chen, L. L., Lo, W. S., Lin, C. P., and Kuo C. H. (2013). Comparative analysis of the peanut witches’-broom phytoplasma genome reveals horizontal transfer of potential mobile units and effectors. PLoS One. 8:e62770. doi: 10.1371/journal.pone.0062770

## Sheet: S2
Supplementary Table 2. Primers used in the study.
Primer name	Sequence (5'→3')	Targets	Purpose
PhylF4	ATGAATAAAGATATTGCTAG	PHYLOYorg	Error-Prone PCR
PHYLorg_to_pGBKT7_F	CTGATCTCAGAGGAGGACCTGCATATGGGGATGAATAAAGATATTG	PHYLOYorg	Library construction
PHYLorg_to_pGBKT7_F	TGCAGGTCGACGGATCCCCGGGAATTAATTATTTTCATCATTTAAAG	PHYLOYorg	Error-Prone PCR
OYopt_K37E_F	AGAAAGAACGCTGTTGAGAAGATCAACACCGAG	PHYLOYopt2	Point mutation
OYopt_K37E_R	CTCGGTGTTGATCTTCTCAACAGCGTTCTTTCT	PHYLOYopt2	Point mutation
SY_F	ATGGATAAGGATATCCCTTC	PHYLSYopt	Error-Prone PCR
pGBK-fragariae-F	AGAGGAGGACCTGCATATGGATAAGGATATCCCTTC	PHYLSYopt	Library construction
pGBK-fragariae-R	TCGACGGATCCCCGGGAATTCTCAATCGTTGAGGTTCTTGA	PHYLSYopt	Error-Prone PCR
SYopt_Q30R_F	TCAACCTCAAGGATAGAATCAGGGAAAACG	PHYLSYopt	Point mutation
SYopt_Q30R_R	CGTTTTCCCTGATTCTATCCTTGAGGTTGA	PHYLSYopt	Point mutation
SYopt_K37E_F	CAGGGAAAACGCTGTGGAGAAGATCAACACCGAG	PHYLSYopt	Point mutation
SYopt_K37E_R	CTCGGTGTTGATCTTCTCCACAGCGTTTTCCCTG	PHYLSYopt	Point mutation
2A-fragariae-F	TCCAACCCTGGGCCCATGGATAAGGATATCCCTTC	PHYLSYopt	Cloning into pTRV2
pTRV2-fragariae-R	GTCCTTAAATCCCTATCAATCGTTGAGGTTCTTGA	PHYLSYopt	Cloning into pTRV2
SY_to_pENTA_optF	AAGGAACCAATTCAGTCATGGATAAGGATATCCCTTCTACC	PHYLSYopt	Cloning into pENTA
SY_to_pENTA_R	AAGCTGGGTCTAGATATCAATCGTTGAGGTTCTTG	PHYLSYopt	Cloning into pENTA
pGBK-JHP-F	AGAGGAGGACCTGCATATGAACAAGGATATCGCTTC	PHYLJHPopt	Cloning into pGBKT7
pGBK-JHP_JWB-R	TCGACGGATCCCCGGGAATCCTCAGTTGTTCTCATCGTTGA	PHYLJHPopt	Cloning into pGBKT7
pGBK-RYD-F	AGAGGAGGACCTGCATATGAACAAGGATATCGCTAC	PHYLRYDopt	Cloning into pGBKT7
pGBK-RYD-R	TCGACGGATCCCCGGGAATTCTCAGTTGTTCTTGTTGTTGA	PHYLRYDopt	Cloning into pGBKT7
pGBK-WBDL-F	AGAGGAGGACCTGCATATGGATCCTAACCTCCCTGG	PHYLWBDLopt	Cloning into pGBKT7
pGBK-WBDL-R	TCGACGGATCCCCGGGAATTCTCAGTTGTTATCATCGTTGA	PHYLWBDLopt	Cloning into pGBKT7
WBDL_A79T_F	GAGCTTATCAAGACTTACCAGATCTTGC	PHYLWBDLopt	Point mutation
WBDL_A79T_R	GCAAGATCTGGTAAGTCTTGATAAGCTC	PHYLWBDLopt	Point mutation
AD_SVP_F	CCAGTACCAGATTACGCTCATATGGCGAGAGAAAAGATTCAGATC	SVP	Cloning into pGADT7
AD_SVP_R	ATGCCCACCCGGGTGGAATTCCTAACCACCATACGGTAAGCC	SVP	Cloning into pGADT7
SVP_to_pENTA_F	AAGGAACCAATTCAGTCATGGCGAGAGAAAAGATTCAGATC	SVP	Cloning into pENTA
SVP_to_pENTA_mnsR	AAGCTGGGTCTAGATAACCACCATACGGTAAGCC	SVP	Cloning into pENTA
pGBKT7-F	TTCCCGGGGATCCGTCGACCTGCAG	pGBKT7	Library construction
pGBKT7-R	ATGCAGGTCCTCCTCTGAGATCAGCTTCTGCTC	pGBKT7	Library construction
BD_R	TTTTCGTTTTAAAACCTAAGAGTC	pGBKT7	Sequencing of inserts

## Sheet: S3
Supplementary Table 3. Plasmids used in the study.
Plasmid	Cloned gene	Purpose	Reference
pGADT7a	SEP3	Y2H	Maejima et al., 2014
	SVP	Y2H	This study
pGBKT7a	PHYLOY	Y2H	Maejima et al., 2014
	PHYLSY	Y2H	Iwabuchi et al., 2020
	PHYLSYQ30R	Y2H	This study
	PHYLOYT78A	Y2H	This study
	PHYLJHP	Y2H	This study
	SAP54	Y2H	Maejima et al., 2014
	PHYLRYD	Y2H	This study
	PHYL231/09	Y2H	Iwabuchi et al., 2020
	PHYLWBDL	Y2H	This study
	PHYLWBDLA79T	Y2H	This study
	PHYLPnWB	Y2H	Kitazawa et al., 2017
pTRV1 (RNA1)b	-	In planta expression by TRV	Iwabuchi et al., 2019
pTRV2 (RNA2)b	PHYLOY	In planta expression by TRV	Iwabuchi et al., 2019
	PHYLOYK37E	In planta expression by TRV	This study
	PHYLSY	In planta expression by TRV	Iwabuchi et al., 2020
	PHYLSYQ30R	In planta expression by TRV	This study
	PHYLSYK37E	In planta expression by TRV	This study
	PHYLSYR64G	In planta expression by TRV	This study
	PHYLSYQ30R/R64G	In planta expression by TRV	This study
	PHYLSYK37E/R64G	In planta expression by TRV	This study
pEarleyGate203c	SEP3	Immunoblotting	Iwabuchi et al., 2019
pEarleyGateN3 × FLAGb	PHYLOY	Immunoprecipitation	Iwabuchi et al., 2019
	PHYLOYT78A	Immunoprecipitation	This study
	PHYLSY	Immunoprecipitation, Immunoblotting	Iwabuchi et al., 2020
	PHYLSYK37E	Immunoprecipitation, Immunoblotting	This study
	PHYLSYR64G	Immunoprecipitation, Immunoblotting	This study
	PHYLSYK37E/R64G	Immunoprecipitation, Immunoblotting	This study
	PHYLWBDL	Immunoprecipitation	This study
pEarleyGateC3mycd	SEP3	Immunoprecipitation	Iwabuchi et al., 2020
	SVP	Immunoprecipitation	This study
a: Purchaced from Clontech
b: Iwabuchi et al., 2019
c: Earley, K.W., Haag, J.R., Pontes, O., Opper, K., Juehne, T., Song, K., et al. (2006) Gateway-compatible vectors for plant functional genomics and proteomics. Plant J. 45, 616–629. doi: 10.1111/j.1365-313X.2005.02617.x
d: Okano et al., 2014

## Sheet: S4
Supplementary Table 4. Comparison of the results of yeast two-hybrid assay using PHYLSY mutants to those of PHYLOY and PHYLSY.
AD/BD	PHYLOY	PHYLSY	PHYLSYQ30R	PHYLSYK37E	PHYLSYR64G
SEP3	+++a	+b	++	+++	+++
Empty	-a	-b	-	-	-
+++: The yeast grew on all media; ++: the yeast grew on −LWH+3AT, −LWH, and −LW; +: the yeast grew on −LWH and −LW; -: the yeast grew on only −LW.
a: Maejima et al., 2014 b: Iwabuchi et al., 2020

## Sheet: S5
Supplementary Table 5. Effect of the mutation in phyllogen to the interaction with MTF.
Effect	Phyllogen	Mutation	Corresponding residues in PHYLOY	Tested MTF	Reference
Enhance	PHYLOY	T78Aa	-	SVP	This study
	PHYLSY	Q30K	30	A- and E-class MTFs	Iwabuchi et al., 2020
		Q30R	30	SEP3	This study
		K37E	37	SEP3	This study
		R64N	64	A- and E-class MTFs	Iwabuchi et al., 2020
		R64G	64	SEP3	This study
Decrease	PHYLOYb	K30Q	-	A- and E-class MTFs	Iwabuchi et al., 2020
		N64R	-	A- and E-class MTFs	Iwabuchi et al., 2020
	SAP54	L27A	27	AGL6	Aurin et al., 2020
	PHYLPnWB	L60S	61	SEP3	Liao et al., 2019
		Y64K	65c	SEP3	Liao et al., 2019
	PHYLWBDL	A79T	78	SVP	This study
No effect	SAP54	I45A	45	AP1, SEP3, AGL6	Aurin et al., 2020
		L65A	65c	AP1, SEP3, AGL6	Aurin et al., 2020
		I69A	69	AP1, SEP3, AGL6	Aurin et al., 2020
	PHYLPnWB	I25K	25	SEP3	Liao et al., 2019
		Y32K	32	SEP3	Liao et al., 2019
a: Number represents the position of mutated amino acid residues in each phyllogen.
b: Other phyllogens were also tested.
c: Considered as a residue, in which mutation can affect the interaction with MTFs.
